# Supplementary material for: Whole Blood Reactivity to Viral and Bacterial Pathogens after Non-Emergent Cardiac Surgery during the Acute and Convalescence Periods Demonstrates a Distinctive Profile of Cytokines Production Compared to the Preoperative Baseline in Cohort of 108 Patients, Suggesting Immunological Reprogramming during the 28 Days Traditionally Recognized as the Post-Surgical Recovery Period
Source: MDPI journal article supplement (doi:10.3390/biomedicines12010028), 2023-12-21
Supplement: s1 [file s1]

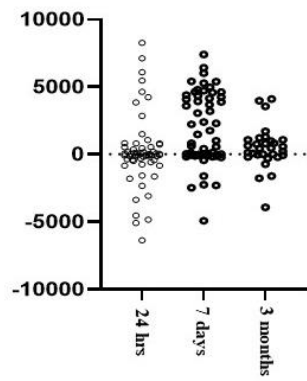

Supplementary Figure S1. Differences plot of IL-6 production after LPS stimulation compared to baseline. Significant heterogeneity was notable in response to LPS with some patients showing increase or decrease in IL-6 in response to LPS.
